# Supplementary material
Source: PubMed Central journal article supplement (PMC4140934)
Supplement: supp_M113.544346_jbc.M113.544346-1.pdf [file supp_M113.544346_jbc.M113.544346-1.pdf]

# New Role for Kruppel-Like Factor 14 as a Transcriptional Activator Involved in the Generation of Signaling Lipids

Thiago De Assuncao, Gwen Lomberk, Sheng Cao, Usman Yaqoob, Angela Mathison, Douglas Simonetto, Robert C. Huebert, Raul Urrutia, Vijay H. Shah

## Supplementary Figure Legends:

Supplementary Figure 1: PCR genotyping of KLF14<sup>-/-</sup> mice. The genotype of the animals used to derive the Klf14<sup>-/-</sup> endothelial liver cells was confirmed by PCR, using 35 cycles of 94°C 30 sec, 55°C 30 sec and 72°C 60 sec with the following primers for Klf14 or the Neomycin cassette: Klf14 forward primer: 5'-TCAACTAGCTGCTTCGAGCC-3' and Klf14 reverse primer: 5'-ACGACCTCGGTACTCGATCA-3'; NEO forward primer: 5'-TCATTCTCAGTATTGTTTTGCC-3', NEO reverse primer: 5'-GAGTTCATCCCTTCTCAAAGG-3'.. The presence of a 323bp product was diagnostic for the presence of the Neomycin cassette and homozygous deletion of Klf14, while a 540bp product indicated an intact Klf14 when run on 1.5% agarose gel

Supplementary Figure 2: qPCR array data showing the mRNA fold change (FGF2/Control) in HHSEC treated with FGF2. The fold changes in mRNA levels are color-coded according to the expression. Different scales of red show up-regulated genes and green boxes shows down regulated genes after FGF2 stimulation. The SK1 gene is highlighted in the figure.

Supplementary Figure 1:

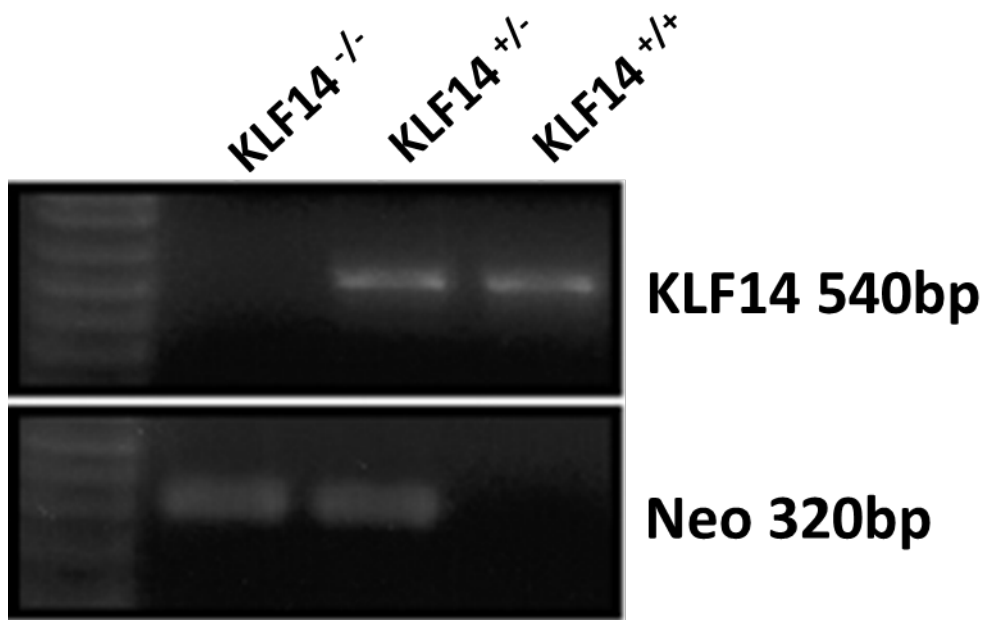

## Supplementary Figure 2:

|         |     |
|---------|-----|
| ANGPTL3 | 2.5 |
| ANGPTL4 | 2.6 |
| COL4A3  | 0.6 |
| CXCL1   | 0.5 |
| CXCL10  | 1.5 |
| CXCL3   | 1.8 |
| TYMP    | 2.4 |
| EFNA1   | 2.8 |
| EFNA3   | 1.6 |
| EREG    | 5.4 |
| ID3     | 2.2 |
| IFNA1   | 2.3 |
| IFNG    | 0.4 |
| IGF1    | 0.6 |
| IL1B    | 1.9 |
| IL6     | 1.5 |
| JAG1    | 1.7 |
| LECT1   | 2.6 |
| MDK     | 1.5 |
| PDGFA   | 1.9 |
| PROK2   | 0.4 |
| SPHK1   | 2.8 |
| TGFA    | 2.3 |
| TIMP3   | 0.4 |
| TNF     | 7.9 |
